# Supplementary material for: Understanding Parents’ Experiences When Caring for a Child With Functional Constipation: Interpretive Description Study
Source: PubMed Central journal article supplement (PMC7857943; doi:10.2196/24851), 2021-01-20
Supplement: pediatrics_v4i1e24851_app2.pdf [file pediatrics_v4i1e24851_app2.pdf]

### **ROME IV Diagnostic Criteria for Functional Constipation in Infants & Toddlers**

|                                                                                              |
|----------------------------------------------------------------------------------------------|
| Must include 1 month of at least 2 or more of the following in infants up to 4 years of age: |
| 2 or fewer defecations per week                                                              |
| History of excessive stool retention                                                         |
| History of painful or hard bowel movements                                                   |
| History of large diameter stools                                                             |
| Presence of a large fecal mass in the rectum                                                 |
| In toilet-trained children, the following addition criteria may be used:                     |
| At least 1 episode/week of incontinence after the acquisition of toilet skills               |
| History of large diameter stools that may obstruct the toilet                                |

Benninga MA, Nurko S, Faure C, Hyman PE, St. James Roberts I, Schechter NL. Childhood Functional Gastrointestinal Disorders: Neonate/Toddler. *Gastroenterology*. 2016;150:1443-1455.e2.

### **ROME IV Diagnostic Criteria for Functional Constipation in Children**

|                                                                                                                                                                           |
|---------------------------------------------------------------------------------------------------------------------------------------------------------------------------|
| Must include 2 or more of the following occurring at least once per week for a minimum of 1 month with insufficient criteria for a diagnosis of irritable bowel syndrome: |
| 2 or fewer defecations in the toilet per week in a child of a developmental age of at least 4 years                                                                       |
| At least 1 episode of fecal incontinence per week                                                                                                                         |
| History of retentive posturing or excessive volitional stool retention                                                                                                    |
| History of painful or hard bowel movements                                                                                                                                |
| Presence of a large fecal mass in the rectum                                                                                                                              |
| History of large diameter stools that can obstruct the toilet                                                                                                             |
| After appropriate evaluation, the symptoms cannot be fully explained by another medical condition                                                                         |

Hyams JS, Di Lorenzo C, Saps M, Shulman RJ, Staiano A, van Tilburg M. Childhood Functional Gastrointestinal Disorders: Child/Adolescent. *Gastroenterology*. 2016;150:1456-1468.e2.
